# Supplementary material for: Comprehensive Analysis of lncRNAs and circRNAs Reveals the Metabolic Specialization in Oxidative and Glycolytic Skeletal Muscles
Source: MDPI journal article supplement (doi:10.3390/ijms20122855), 2019-06-12
Supplement: s1 [file s1]

## *Supplementary Material*

### **Comprehensive analysis of lncRNAs and circRNAs reflects the metabolic specialization in oxidative and glycolytic skeletal muscles**

Linyuan Shen, Qianzi Tang, Guoqing Tang, Yanzhi Jiang, Mingzhou Li, Lei Chen, Lin Bai, Surong Shuai, Jinyong Wang, Xuewei Li, Kun Liao, Shunhua Zhang, & Li Zhu

**Supplementary Table S1.** The measured weight of Qingyu pigs

| <b>Age</b> | <b>0 day</b>   | <b>23 day</b>  | <b>35 day</b>  | <b>50 day</b>  | <b>70 day</b>  |
|------------|----------------|----------------|----------------|----------------|----------------|
| BW         | 0.76±0.08      | 4.63±0.88      | 6.91±0.93      | 9.70±1.48      | 14.13±0.85     |
| <b>Age</b> | <b>90 day</b>  | <b>120 day</b> | <b>150 day</b> | <b>165 day</b> | <b>180 day</b> |
| BW         | 22.78±2.95     | 39.37±3.14     | 55.36±4.71     | 63.54±5.28     | 69.32±6.30     |
| <b>Age</b> | <b>195 day</b> | <b>225 day</b> | <b>255 day</b> | <b>270 day</b> | <b>300 day</b> |
| BW         | 75.60±7.81     | 85.15±6.64     | 99.22±8.26     | 105.17±7.66    | 113.13±7.52    |
| <b>Age</b> | <b>330 day</b> | <b>360 day</b> | <b>385 day</b> | <b>400 day</b> |                |
| BW         | 128.32±9.75    | 137.94±7.78    | 143.04±7.49    | 146.65±6.26    |                |

BW, body weight.

**Supplementary Table S2.** Fitting parameters of Logistic nonlinear curves

| Model    | k       | a      | b     | R <sup>2</sup> | Age (MGR) | Index (MGR) |
|----------|---------|--------|-------|----------------|-----------|-------------|
| Logistic | 130.404 | 24.613 | 0.018 | 0.974          | 177.960   | 65.202      |

MGR, the point of maximum growth rate

**Supplementary Table S3.** Summary of transcriptome data

| Sample                        | LDM_1    | LDM_2    | LDM_3    | PMM_1    | PMM_2    | PMM_3    |
|-------------------------------|----------|----------|----------|----------|----------|----------|
| Valid reads                   | 86930486 | 86411128 | 86581698 | 86844958 | 85596078 | 86113732 |
| Mapped reads                  | 71.91%   | 71.66%   | 75.01%   | 71.96%   | 72.09%   | 72.24%   |
| Unique Mapped reads           | 61.51%   | 63.15%   | 58.98%   | 62.43%   | 61.42%   | 60.62%   |
| Multi Mapped reads            | 10.40%   | 8.51%    | 16.03%   | 9.53%    | 10.67%   | 11.61%   |
| PE Mapped reads               | 32.47%   | 32.38%   | 34.08%   | 32.54%   | 32.16%   | 32.51%   |
| Mapped left reads             | 37.22%   | 36.79%   | 38.55%   | 37.22%   | 37.12%   | 37.39%   |
| Mapped right reads            | 34.70%   | 34.87%   | 36.46%   | 34.74%   | 34.97%   | 34.84%   |
| Reads map to sense strand     | 30.75%   | 31.76%   | 29.68%   | 31.22%   | 31.03%   | 30.46%   |
| Reads map to antisense strand | 30.76%   | 31.39%   | 29.30%   | 31.21%   | 30.38%   | 30.17%   |
| Non-splice reads              | 36.06%   | 40.56%   | 33.66%   | 39.49%   | 38.88%   | 36.57%   |
| Splice reads                  | 25.45%   | 22.58%   | 25.32%   | 22.94%   | 22.54%   | 24.06%   |
| Back-spliced junctions reads  | 0.85%    | 0.74%    | 1.10%    | 0.72%    | 0.98%    | 0.87%    |

**Supplementary Table S4. Statistics of identified lncRNAs**

| Sample | "i" | "j" | "o" | "u"  | "x" |
|--------|-----|-----|-----|------|-----|
| LDM_1  | 293 | 13  | 39  | 1985 | 134 |
| LDM_2  | 333 | 14  | 38  | 2329 | 141 |
| LDM_3  | 262 | 15  | 39  | 1867 | 121 |
| PMM_1  | 280 | 14  | 39  | 1837 | 133 |
| PMM_2  | 261 | 15  | 39  | 1844 | 120 |
| PMM_3  | 256 | 14  | 38  | 1675 | 124 |

J: Potentially novel isoform (fragment): at least one splice junction is shared with a reference transcript; I: A transfrag falling entirely within a reference intron; O: Generic exonic overlap with a reference transcript; U:Unknown, intergenic transcript; X:Exonic overlap with reference on the opposite strand

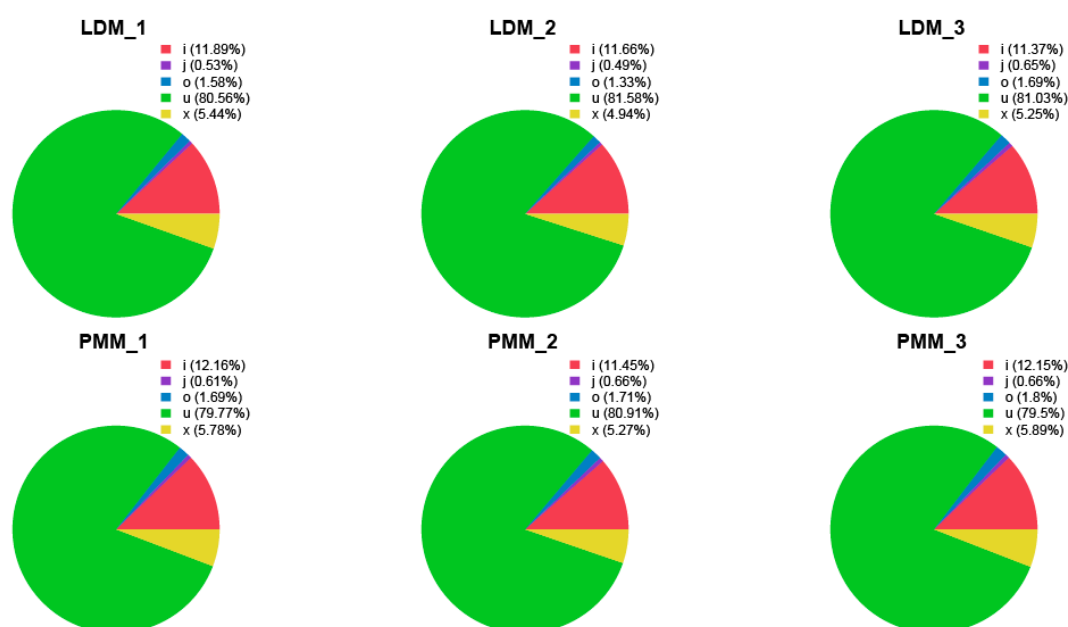

**Supplementary Fig.S1.** The type and distribution of identified lncRNAs. J: Potentially novel isoform (fragment): at least one splice junction is shared with a reference transcript; I:A transfrag falling entirely within a reference intron; O: Generic exonic overlap with a reference transcript; U:Unknown, intergenic transcript; X:Exonic overlap with reference on the opposite strand.

**Supplementary Table S8. Ingredient composition and nutrient levels of experimental diets (as fed basis,%)**

| <b>Ingredients</b>                 | <b>7-11kg</b> | <b>11-25kg</b> | <b>25-50kg</b> | <b>50-75kg</b> | <b>&gt;75kg</b> |
|------------------------------------|---------------|----------------|----------------|----------------|-----------------|
| Corn grain                         | 27.19         | 35.00          | 68.57          | 75.13          | 78.03           |
| Expand corn                        | 25.00         | 23.68          | 0.00           | 0.00           | 0.00            |
| Soybean oil                        | 2.50          | 1.80           | 3.00           | 3.00           | 3.00            |
| Sucrose                            | 2.00          | 2.00           | 2.00           | 0.00           | 0.00            |
| Wheat bran                         | 0.00          | 0.00           | 3.00           | 3.00           | 5.00            |
| Whey powder                        | 12.00         | 7.00           | 0.00           | 0.00           | 0.00            |
| Soybean meal                       | 8.00          | 12.00          | 18.20          | 15.50          | 10.90           |
| Full-fat soybean                   | 5.00          | 8.00           | 0.00           | 0.00           | 0.00            |
| Soy protein concentrate            | 5.00          | 3.00           | 0.00           | 0.00           | 0.00            |
| Whole milk powder                  | 3.00          | 0.00           | 0.00           | 0.00           | 0.00            |
| Fishmeal (CP 62.5 %)               | 4.00          | 3.00           | 2.00           | 0.00           | 0.00            |
| Plasma protein powder              | 3.00          | 1.00           | 0.00           | 0.00           | 0.00            |
| L-Lys·HCl                          | 0.45          | 0.46           | 0.42           | 0.44           | 0.40            |
| DL-Met                             | 0.15          | 0.16           | 0.14           | 0.12           | 0.10            |
| L-Thr                              | 0.15          | 0.16           | 0.14           | 0.15           | 0.14            |
| L-Try                              | 0.01          | 0.02           | 0.03           | 0.03           | 0.03            |
| Choline chloride 50%               | 0.15          | 0.10           | 0.10           | 0.10           | 0.10            |
| CaCO <sub>3</sub>                  | 1.00          | 0.92           | 0.90           | 0.89           | 0.80            |
| CaHPO <sub>4</sub>                 | 0.10          | 0.40           | 0.70           | 0.84           | 0.70            |
| NaCl                               | 0.30          | 0.30           | 0.30           | 0.30           | 0.30            |
| Premix <sup>1</sup>                | 1.00          | 1.00           | 0.50           | 0.50           | 0.50            |
| Total                              | 100.00        | 100.00         | 100.00         | 100.00         | 100.00          |
| <b>Nutrient levels<sup>2</sup></b> |               |                |                |                |                 |
| DE (Kcal/kg)                       | 3.58          | 3.48           | 3.39           | 3.40           | 3.39            |
| CP (%)                             | 19.55         | 18.35          | 15.68          | 13.73          | 12.18           |
| Ca (%)                             | 0.79          | 0.71           | 0.66           | 0.59           | 0.52            |
| STTD P (%)                         | 0.39          | 0.34           | 0.31           | 0.27           | 0.25            |
| SID Lys (%)                        | 1.36          | 1.23           | 0.98           | 0.85           | 0.73            |
| SID Met+cys (%)                    | 0.74          | 0.69           | 0.55           | 0.55           | 0.42            |
| SID Thr (%)                        | 0.80          | 0.73           | 0.58           | 0.52           | 0.46            |
| SID Trp (%)                        | 0.22          | 0.20           | 0.17           | 0.15           | 0.13            |

Note 1: Contents per kg of diet for 7-25 kg BW Period: Fe, 150 mg; Cu, 195 mg; Zn, 150 mg; Mn, 30 mg; I, 0.3 mg; Se, 0.3 mg; vitamin A, 12000 IU; vitamin D, 3200 IU; vitamin E, 80 mg; vitamin K<sub>3</sub>, 32.50 mg; vitamin B<sub>1</sub>, 2.30 mg; vitamin B<sub>2</sub>, 6.50 mg; vitamin B<sub>6</sub>, 5 mg; vitamin B<sub>12</sub>, 50 µg; nicotinic acid, 45 mg; pantothenic acid, 20 mg; folic acid, 1.50 mg; biotin, 0.15 mg; enzyme preparation and preservatives. Contents per kg of diet for 7-25 kg BW Period: Fe, 120 mg; Cu, 17 mg; Zn, 100 mg; Mn, 25 mg; I, 0.3 mg; Se, 0.2 mg; vitamin A, 5512 IU; vitamin D, 2250 IU; vitamin E, 24 mg; vitamin K<sub>3</sub>, 3 mg; vitamin B<sub>2</sub>, 6 mg; vitamin B<sub>6</sub>, 3 mg; vitamin B<sub>12</sub>, 24 µg; pantothenic acid, 15 mg; folic acid, 1.20 mg; biotin, 0.15 mg; enzyme preparation and preservatives. Note 2: Nutrient levels were calculated values.

**Supplementary Table S9.** Information of primers used to perform q-PCR

| Gene symbol                    | Forward primer (5'-3')  | Reverse primer (5'-3')         |
|--------------------------------|-------------------------|--------------------------------|
| <i>COX2</i>                    | GCACCCCGACATAGAGAGC     | CTGCGGAGTGCAGTGTCT             |
| <i>ND1</i>                     | CCACTACCAATACCCTACCCTC  | TGCGTATTTTGAGTTGGATGCT         |
| <i>ATP6</i>                    | AAACATCACTAGCCCACTTTCT  | TAATGTTGGCTGTCAGTCGTAC         |
| <i>GCG</i>                     | GAATCAACACCATCGGTCAAAT  | CTCCACCCATAGAATGCCCAGT         |
| <i>LncRNA14704</i>             | CAAGCCTCATCTGAATCCTCTA  | GTCCCACTATCCTCACTGCTAA         |
| <i>LncRNA3569</i>              | GAGGAGCAAGATTTAAGAGGCG  | CCCTGAGTAGATGATACCCACA         |
| <i>LncRNA6176</i>              | ATCTGGTGTGTCTACTGCTTGG  | TTAGGAAATATCCATTGTTTGG         |
| <i>Foxj3</i>                   | GAAACCTCCATACAGTTACGCC  | CACTTGTTGAGGGACAGATTAT         |
| <i>MEF2C</i>                   | GGGTATGGCAATCCCCGAAACT  | TTGCTGCCTGGTGGGAATAAGAA        |
| <i>SIRT1</i>                   | TCTTCCCTGAAAGTAAGACCAG  | GGCATATTCACCTCCTAACCTA         |
| <i>miR-27b</i>                 | TTCACAGTGGCTAAGTTCTGC   | R-primer (Uni-miR qPCR Primer) |
| <i>miR-23a</i>                 | ATCACATTGCCAGGGATTTC    | R-primer (Uni-miR qPCR Primer) |
| <i>miR-217</i>                 | TACTGCATCAGGAAGTATTGGAT | R-primer (Uni-miR qPCR Primer) |
| <i>circRNA290</i>              | GATGTGGAATGATTTCTTCTGG  | ATCAGATCCAAGTCACGGTCGC         |
| <i>circRNA9210</i>             | ACAAACTATTATGGTAATGGAA  | CCACAGTTCAACAACAGACCAA         |
| <i>circRNA41</i>               | TGGGTTCAATTTCTGACCTTAC  | AAACGCATTACACAGGTATTCA         |
| <i>circRNA118</i>              | TCCCGCTCAAATCACATCAAG   | TGCAACTTGCAAACCGCCAGG          |
| <i>circRNA1208</i>             | ATATCTATGCAGACACCATCCT  | TCTCCTGTGCCCATCATTGTGTG        |
| <i>circRNA154</i> (Divergent)  | TACAAATAAATCCCTGCGTAAA  | CCTCCTGTCTGGCATAAAGTAA         |
| <i>circRNA154</i> (Convergent) | GTGAGGACGGAAGTGTGGG     | CCTCTGCGGTGCGCACCTTATT         |
| <i>ACTB</i> (Divergent)        | ACTCGTCGTAATCCTGCTTGCT  | CCCCTGCGCTTCTGCTTTCCTC         |
| <i>ACTB</i> (Convergent)       | TCTGGCACCACACCTTCT      | TGATCTGGGTCATCTTCTCAC          |
| <i>TBP</i>                     | GATGGACGTTTCGGTTTGG     | AGCAGCACAGTACGAGCAA            |
| <i>TOP2B</i>                   | AACTGGATGATGCTAATGATGCT | TGGAAAACTCCGTATCTGTCTC         |

*COX2*: cytochrome c oxidase subunit 2; *ND1*: NADH dehydrogenase subunit 1; *ATP6*: ATP synthase F0 subunit 6; *GCG*: glucagon; *Foxj3*: forkhead box J3; *MEF2C*: myocyte enhancer factor 2C; *SIRT1*: sirtuin 1; *ACTB*: actin beta; *TBP*: TATA-box binding protein; *TOP2B*: DNA topoisomerase II beta. Uni-miR qPCR Primer included in commercial kits.
